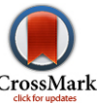

# Improving Retention of Very Old Participants in Longitudinal Research: Experiences from the Newcastle 85+ Study

Karen Davies<sup>1,2\*</sup>, Andrew Kingston<sup>1,2</sup>, Louise Robinson<sup>1,2</sup>, Joan Hughes<sup>1</sup>, Judith M. Hunt<sup>1</sup>, Sally A. H. Barker<sup>1</sup>, June Edwards<sup>1</sup>, Joanna Collerton<sup>1,2</sup>, Carol Jagger<sup>1,2</sup>, Thomas B. L. Kirkwood<sup>1,3</sup>

**1** Newcastle University Institute for Ageing, Campus for Ageing and Vitality, Newcastle upon Tyne, United Kingdom, **2** Institute of Health and Society, Newcastle University, Newcastle upon Tyne, United Kingdom, **3** Institute for Cell and Molecular Biosciences, Newcastle University, Newcastle upon Tyne, United Kingdom

## Abstract

**Background:** People aged 85 and over are often excluded from research on the grounds of being difficult to recruit and problematic to retain. The Newcastle 85+ study successfully recruited a cohort of 854 85-year-olds to detailed health assessment at baseline and followed them up over 3 phases spanning 5 years. This paper describes the effectiveness of its retention strategies.

**Methods:** Primary retention strategies involved meticulous management of contact information and active maintenance of contact with participants between research visits and between phases of the study. For statistical analysis, data on post-inclusion attrition over the 3 follow-up phases was separated into 'death' and 'withdrawal' categories, with sub-categories 'health' and 'non-health' reasons created for 'withdrawal'. Multinomial logistic regression was used to determine if particular socio-demographic and health characteristics were associated with post-inclusion attrition due to withdrawal at each of the 3 phase-to-phase transition points.

**Results:** For both sexes, at successive follow-up phases there was a decrease in attrition due to withdrawal and an increase due to death. Withdrawal was most prevalent between baseline and phase 2. Across the 5 years of the study total post-inclusion (post-baseline) attrition due to death accounted for a 40% (344/854) loss to cohort and total post-inclusion attrition due to withdraw a 19% (166/854) loss to cohort, with health reasons for withdrawal becoming more dominant over time. Adjusting for sex, parsimonious modelling showed only occupational class (National Statistics Socio-economic Classification) to be associated with withdrawal and only between baseline and phase 2 (routine/manual compared to managerial (OR 3.41; 95% CI [1.23 to 9.44]).

**Conclusion:** Following successful recruitment, we retained a high proportion of participants from a very old age group over 5 years of longitudinal research. No strong predictors of post-inclusion attrition due to withdrawal were found, suggesting the general effectiveness of our retention strategies.

**Citation:** Davies K, Kingston A, Robinson L, Hughes J, Hunt JM, et al. (2014) Improving Retention of Very Old Participants in Longitudinal Research: Experiences from the Newcastle 85+ Study. PLoS ONE 9(10): e108370. doi:10.1371/journal.pone.0108370

**Editor:** Alessandra Marengoni, Karolinska Institutet, Italy

**Received:** July 23, 2014; **Accepted:** August 21, 2014; **Published:** October 10, 2014

**Copyright:** © 2014 Davies et al. This is an open-access article distributed under the terms of the Creative Commons Attribution License, which permits unrestricted use, distribution, and reproduction in any medium, provided the original author and source are credited.

**Data Availability:** The authors confirm that all data underlying the findings are fully available without restriction. All relevant data are within the paper.

**Funding:** The Newcastle 85+ Study was supported by a combined grant from the Medical Research Council and Biotechnology and Biological Sciences Research Council (reference G0500997), and a grant from the Newcastle Healthcare Charity and the Dunhill Medical Trust. The funders had no role in study design, data collection and analysis, decision to publish, or preparation of the manuscript.

**Competing Interests:** The authors have declared that no competing interests exist.

\* Email: Karen.davies@ncl.ac.uk

## Introduction

People aged 85 years and older, the 'very old', are the fastest growing age-sector of the population in many countries. They are also assumed to be the most demanding of care [1], with little in the way of direct evidence.

A small number of longitudinal studies focussing on the actual needs and health-seeking behaviours of the very old are emerging, these include the Leiden 85+ Study [2], the Danish nonagenarian and centenarian studies [3], the Life and Living in Advanced Age Study in New Zealand (LiLACS NZ) [4], and in the UK the Medical Research Council Cognitive Function and Ageing Study

(MRC CFAS) [5], the English Longitudinal Study of Ageing (ELSA) [6] and the Newcastle 85+ Study [7]. Nevertheless, very old people remain as seriously under-represented in research studies, despite reports reviewing ways to improve recruitment of older people to research through good practice [8,9]. Once recruited to research, a related issue is how to *retain* very old participants, particularly across successive phases of longitudinal studies, where the risk of dropout threatens the validity, generalizability and cost-effectiveness of research [10–16]. The Newcastle 85+ Study, a population-based longitudinal study of health in the over-85s, achieved a high level of initial recruitment

at baseline [9]. We here describe the effectiveness of retention strategies employed in the study's three follow-up phases spanning five years.

## Methods

### Ethics

Initial approval was given by Newcastle and North Tyneside Local Research Ethics Committee 1 on the 24<sup>th</sup> February 2006. The REC reference number: The Newcastle 85+ Study: Biological, Clinical and Psychosocial factors associated with healthy ageing is 06/Q0905/2. Written informed consent was obtained from participants; where individuals lacked capacity to consent, for example because of cognitive impairment, a formal written opinion was sought from a relative or carer [9].

### Conduct of the study

The Newcastle 85+ Study approached all people turning 85 in 2006 and permanently registered with participating general practices (83% 53/64) in Newcastle or North Tyneside. Participating practices were similar to those which did not participate across key practice variables [7]. Individuals consented to health assessments (HA) and/or a review of their general practice medical records (GPRR). HA was conducted at baseline and then at 3 follow-up phases (at 18 months [Phase 2], 3 years [Phase 3] and 5 years [Phase 4]) by a research nurse in the participant's usual residence. GPRR was conducted at baseline, and at phases 3 and 4, in order to obtain information on disease status, medication and use of general practice GP services (Figure 1).

### Attrition Data

Reasons for non-participation at baseline and post inclusion (post-baseline) attrition -due to death and -due to withdrawal were recorded, with the latter being sub-categorised into two groups: i) health - the participant's own health status was given as a major factor, and ii) non-health (included 'no reason given' as participants were advised they did not have to provide a reason).

### Retention Strategies

Maintaining contact and managing up-to-date contact information plays a vital role in participant retention [11,17]. Information such as time of day, day of week, and date of any contact attempt, even if failed, was fully recorded alongside address, telephone number, and consultee or family representative details. Participants were asked to nominate an alternative contact person in case their health should deteriorate. Salient points and outcomes of conversations with participants or their families/carers were also recorded, including caring responsibilities of the participant, family dynamics and health, planned holidays and appointments, significant relationships with neighbours and key holders.

The nurse team used such information to assess whether participants, or where appropriate their family/carers, might benefit from additional brief personal visits, usually whilst the research nurse was in the area or visiting another participant in a particular care home. Balancing the maintenance of contact, as opposed to causing annoyance or distress, was founded on our actively managed awareness of participants' individual circumstances and their changing needs. All such details were held securely on an electronic database (Microsoft Access), and regularly updated and crosschecked, with the nurse team taking ownership of this task.

Additionally, strategies to keep the study 'alive' for participants, both between research visits within a phase and between research

phases were employed, including actions recommended by others [11,17–19] such as reminder letters, newsletters, telephone calls, Christmas cards, and gifts of everyday items for instance a mug and tea-towel, all displaying the study logo.

The most ambitious efforts to maintain contact and keep the study 'alive' included holding a celebratory event for participants and their families during phase 3 of the study. Lunch and refreshments were provided, along with entertainment from a drama group and a choir. Transport to and from the venue was made available to those who needed this. This event provided an opportunity to share preliminary research findings and for open discussion between participants and the study team. Also, the publication of a book telling the 'story' of the Newcastle 85+ study from participant and research team perspectives; how the study came into being, what had been discovered so far (including 'lay' synopsis of publications), and why it mattered [20]. A copy of the book was given to each participant along with a signed letter of thanks. In the event of participant death books were given to significant others.

### Statistical methods

To determine if particular socio-demographic and health characteristics were associated with post-inclusion attrition due to withdrawal, multinomial logistic regression was used to compare three groups across all the phase-to-phase transition points: those who withdrew for health reasons, those who withdrew for non-health reasons, and those who remained in the study. The same socio-demographic and health characteristics - years of education, National Statistics Socio-economic Classification (NS-SEC [21]), area deprivation (Index of Multiple Deprivation IMD [22]), marital status, living arrangements, housing type, self-rated health (SRH), depression, disability, cognition, disease burden (disease count - Table 1. Box 1), and health service use (comprising: GP consultations and hospital inpatient in past year) - were examined at each analysis point; these were time-varying if measured at subsequent phases and time-constant otherwise. These characteristics were selected upon existing evidence linking them to post-inclusion attrition due to withdrawal in longitudinal cohorts of older adults [23–30]. Initially analysing variables individually, then constructing a parsimonious model using all variables by means of a back step approach. No models were retained in the final longitudinal model (baseline to phase 4). We therefore repeated analysis for each phase-to-phase transition separately. Models were also adjusted for sex since others have shown this to impact on attrition. [31,32] and we have already shown that very old women have significantly greater morbidity and disability [7]. Analyses were carried out in Stata 12.1 (StataCorp. 2011. *Stata Statistical Software: Release 12*. College Station, TX: StataCorp LP).

## Results

### Baseline recruitment

Contact was established with 97% (1409/1459) of those invited to participate in the study and written informed consent was obtained from 74% (1042/1409) of these [9]. 851 individuals consented to undergo both HA and GPRR; 3 gave consent to HA only (declining GPRR); 188 consented to GPRR only (declining multidimensional health assessment); and 358 declined all participation. Women were more likely than men to decline either all participation or participation in HA, however the resulting 85+ cohort (those participating in HA n854) was socio-demographically representative of the local population, and of England and Wales, including the proportion in care homes [7].

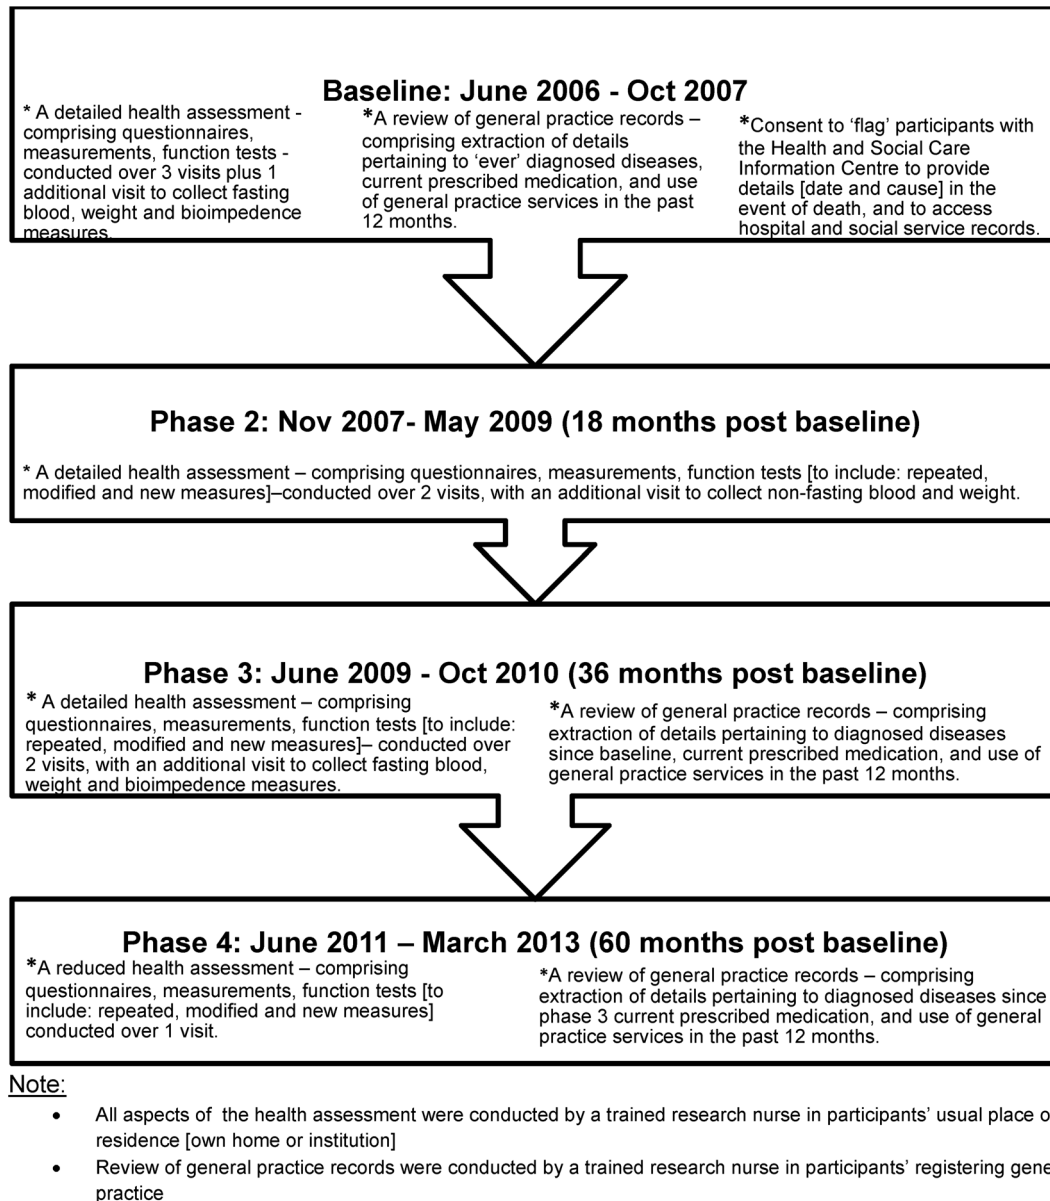

**Figure 1. The Newcastle 85+ Study Timeline and Overview.** A diagrammatic representation showing overall timescale of the Newcastle 85+ study and detailing content for each phase of the study. doi:10.1371/journal.pone.0108370.g001

## Retention

Figure 2 presents the phase-to-phase retention profile for the 85+ cohort illustrating overall retention rates of 74% (631/854) baseline to phase 2 (attrition -due to death 16% (135/854), -due to withdraw 10% (88/854), 57% (484/854) phase 2 to phase 3 (attrition -due to death 11% (95/854), -due to withdraw 6% (51/854)), and 40% (344/854) phase 3 to phase 4 (attrition -due to death 13% (114/854), -due to withdraw 3% (27/854)). Ultimately across the five years of the study 40% of participants (344/854) were lost to death. Of the survivors, two-thirds were retained (344/510 (or 40% (344/854) of 85+ cohort)) and one-third lost to withdrawal (166/510 (or 19% (166/854) of 85+ cohort)).

## i) Sex and Post-inclusion attrition

Figure 2 also presents results for men and women separately, where for both sexes at successive follow-up phases, we observed a *decrease* in post-inclusion attrition due to withdrawal and an *increase* due to death. Slightly more women than men withdrew at each follow-up phase ((baseline to phase 2 f:m = 12%:8%); (phase 2 to phase 3 f:m = 9%:7%) and (phase 3 to phase 4 f:m = 7%:3%)) but fewer women died ((baseline to phase 1 f:m = 13%:20%); (phase 2 to phase 3 f:m = 14%:18%) and (phase 3 to phase 4 f:m = 20%:30%)), though gender differences were not significant ( $p = 0.1325$ ).

## ii) Reasons for post-inclusion attrition due to withdrawal

Table 2 presents the reasons given by the 85+ cohort (for men and women separately), or their families where indicated, for

**Table 1.** Box 1: Disease Count.

| DISEASE GROUP                     | ASCERTAINMENT CRITERIA                                                                                                                                                                                                                  |
|-----------------------------------|-----------------------------------------------------------------------------------------------------------------------------------------------------------------------------------------------------------------------------------------|
| Arthritis*                        | Any recorded diagnosis of Generalised Osteoarthritis, Hand, Hip and Knee Osteoarthritis Rheumatoid, Degenerative, Poly, Gouty, Septic, Peri, Lumbar Spondylosis, Cervical Spondylosis, Ankylosing Spondylitis and Psoriatic Arthropathy |
| Hypertension*                     | Any recorded diagnosis of Hypertension                                                                                                                                                                                                  |
| Cardiac disease*                  | Heart Failure, Ischaemic heart disease (Angina, Myocardial Infarction, Coronary Artery Bypass Graft, Coronary Angioplasty/Stent)                                                                                                        |
| Respiratory disease*              | Bronchiectasis, Pulmonary Fibrosis, Fibrosing Alveolitis, Asbestosis, Pneumoconiosis, Asthma, Chronic Bronchitis, Emphysema, COPD                                                                                                       |
| Cerebrovascular disease*          | Stroke, Transient Ischaemic Attack, Carotid Endarterectomy                                                                                                                                                                              |
| Diabetes mellitus*                | Type I, Type II and type unspecified                                                                                                                                                                                                    |
| Cancer*                           | Any cancer diagnosis in past 5 years excluding non-melanoma skin cancer                                                                                                                                                                 |
| Cognitive Impairment <sup>†</sup> | Standardised Mini-Mental State Examination (sMMSE) score of $\leq 21$                                                                                                                                                                   |

## NOTE:

- \* Data taken from GP record review.
- † Score calculated from health assessment (sMMSE).

doi:10.1371/journal.pone.0108370.t001

withdrawal at each follow-up phase. At transition from baseline to phase 2, health reasons accounted for 40% (35/88) of all withdrawals with 'too ill' being the most frequently reported reason for both men and women (83%; 29/35). For non-health reasons, accounting for 60% (53/88) of all withdrawals, 'too much hassle' was most frequently reported (28%; 15/53), driven by women (f:m = 13:2). At transition from phase 2 to phase 3, health reasons increased to account for 69% of all withdrawals (35/51) with 'too ill' again the most frequent reason for both sexes (83%; 29/35). Non-health reasons reduced considerably to account for 31% (16/51) of all withdrawals, again driven by women (f:m = 14:2). Of the non-health category, 'no reason' was the most frequently recorded response (38%; 6/16), with a f:m ratio of 5:1, and 'lost interest' a close second (31%; 5/16) populated entirely by women. At transition from phase 3 to phase 4, although the proportion of withdrawals due to health reasons decreased, they still accounted for the majority of withdrawals (56%; 15/27), with 'too ill' being the most frequently reported (52%; 14/15), and led by women (f:m = 13:1). Non-health reasons accounted for 44% of all withdrawals (12/27), with 'no reason' most frequently reported (58%; 7/12), led by women (f:m = 5:2).

### iii) Socio-demographic and health characteristics associated with post-inclusion attrition due to withdrawal

Investigation of attrition between baseline and phase 2 highlighted associations with three of the socio-demographic and health characteristics examined (Table 3). Participants who belonged to the 'withdrew for health reasons' group versus those who continued participation were nearly five times as likely to have held routine/manual occupations during their working life (OR: 5.38; 95% CI [1.59 to 18.19]). A similar pattern was seen for those who had rated their health as fair or poor at baseline (OR: 3.09; 95% CI [1.15 to 8.31]). However, confidence intervals surrounding these odds ratios are wide due to the small numbers of people belonging to these groups. Participants were 51% less likely to have withdrawn for health reasons versus continued to participate if they had difficulty with 1 to 6 activities of daily living ((I)ADL's) compared with those who had difficulty with 7 or more activities (OR: 0.49; 95% CI (0.27 to 0.91)). When examining attrition between phases 2 and 3, participants withdrawing for non-health reasons were more likely to live in areas with higher deprivation (IMD) or in 'institutional care'

housing type when compared with those continuing participation. However, numbers were low in these groups giving wide margins in the calculated confidence intervals. When examining attrition between phases 3 and 4, those who suffered from severe depression were more likely to withdraw for health reasons than those continuing participation; again a wide confidence interval prevents drawing any definitive conclusion. Constructing a parsimonious model yielded results indicating that only NS-SEC showed an association with post-inclusion attrition between baseline and phase 2 after adjusting for sex, with participants belonging to the 'withdrew for health reasons' group being significantly more likely to have held routine/manual occupations (OR 3.41; 95% CI [1.23 to 9.44]) than those who remained in the study. There were no detectable associations with participation status at the phase 2 to 3 or phase 3 to 4 transition points when all variables were considered together.

## Discussion

Whilst the greatest attrition in our study occurred between baseline and phase 2, overall retention rates were good and, although showing some associations, statistical analysis detected no strong predictors of attrition due to withdrawal, suggesting minimal attrition bias. While our findings accord with the fact that women live longer than men [33] but with greater levels of disability [34–37], they conflict with those reporting that post-inclusion attrition rates due to withdrawal increase with length of follow-up [13,38]. A systematic review found that only increasing age and cognitive impairment were significantly associated with greater attrition due to withdrawal in longitudinal studies of ageing [28]. Although we could not assess the impact of age from our single birth cohort, we did not find evidence that attrition was higher in those with cognitive impairment. Our experience suggests some notion of increasing loyalty, or investment over time, by our participants as well as continued interviewer training. We attribute our findings that attrition did not appear to be related to socio-economic status or health to the success of our retention strategies.

The strategies of maintaining participant contact additional to scheduled study visits undoubtedly came with resource costs. However, whereas other studies, such as Blanton et al's [39] study of stroke survivors, reported that such strategies are too labour intensive and yield little benefit, our experience was that in

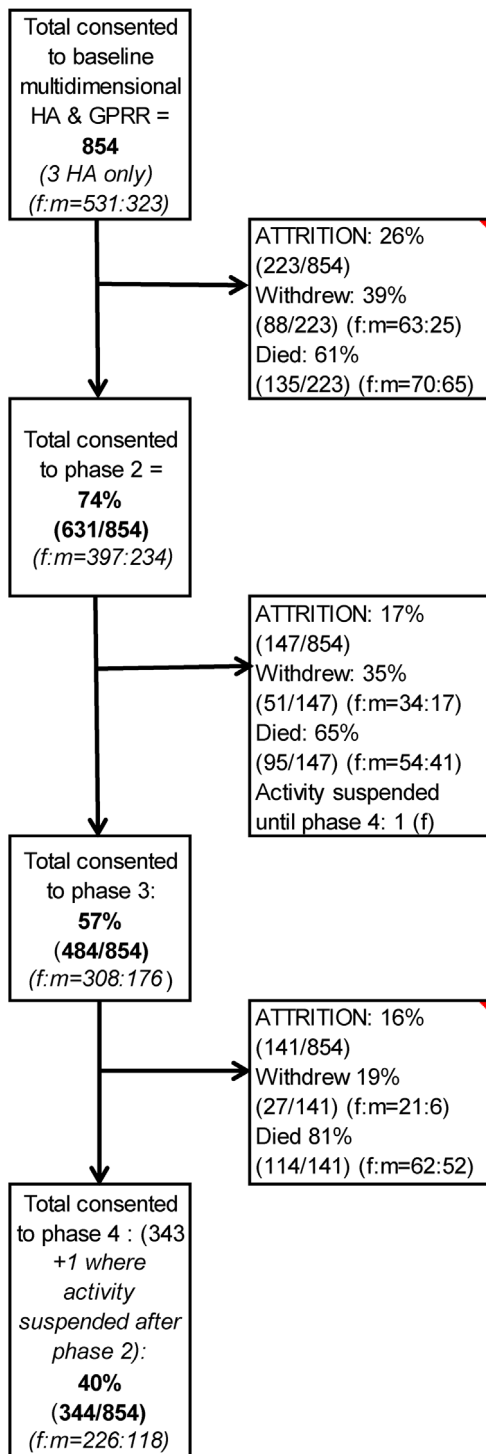

**Figure 2. The Newcastle 85+ Study cohort phase to phase retention profile.** A diagrammatic representation of activity for the Newcastle 85+ study cohort (n854). Detailing retention of the cohort at each phase, showing figures for men and women separately, and attrition due to withdrawal and attrition due to death separately. doi:10.1371/journal.pone.0108370.g002

longitudinal research focussing solely on a very old population, there was much to be gained.

### Challenges in maintaining contact

A particular challenge to maintaining participant contact was the use of a telephone system withholding caller ID, as does the Newcastle University system. This problem was detected when participants, first labelled as 'unable to establish telephone contact' and then successfully contacted by alternative approaches, disclosed that they did not answer the telephone, or had been instructed by their family not to do so, if caller ID was withheld. To resolve this, in addition to contact protocols stipulating that telephone calls be made on alternate days and at different times of the day [9], the nurse team attempted at least one or two calls using a mobile phone.

Moving home is commonplace among older populations, for example to live in closer proximity to family or to move into a care home [40]. On average 6% of the Newcastle 85+ Study cohort changed address at each of the 3 follow-up phases (40;49;57/854), with over 50% of these being 'new' transitions into care homes from private homes. Clearly, change of address is a challenging issue for researchers attempting to remain in contact with study participants. Other longitudinal studies involving older people report change of address as a major contributory factor of loss to follow-up accounting for 9% of total attrition over 4 years [27]. Across the duration of our study, only 0.5% (5/854) of participants were lost to follow up. This was made possible through effective engagement of various 'gatekeepers', often in combination. Researchers are urged to use great sensitivity when participants move into care, as these transitions are often associated with deterioration in health and independence. In such situations, family emotions of anxiety and guilt are not uncommon and notifying researchers of a change of address is not a priority. Maintaining a good relationship with general practice (GP) staff and, where relevant, care home staff proved valuable, as they were supportive in forwarding study contact letters asking participants or relatives to contact research staff. A further resource in re-establishing contact with participants who changed address existed for those who had consented to having their records flagged with the Health and Social Care Information Centre. This enabled us to identify and contact a new registering general practice, again to request the forwarding of a study contact letter. If the new practice was not already participating in, or indeed aware of, the study, we reverted to our GP recruitment protocol [9], guiding surgeries through the aims of the study.

### Using participant feedback to overcome barriers

Feedback not only relates to providing participants with ongoing information but also to the collection of information from the participants' perspectives. Where given, we formally captured reasons for withdrawal, as well as the experiences of participants who continued with the study, asking at the end of each health assessment 'How did you find this interview?', and recording responses verbatim.

Effective use was made of this information through 'reflexive practice' techniques at scheduled weekly meetings of the research nurse team. This involved questioning our own attitudes, thoughts and reactions in relation to others and, if necessary, revising our ways of relating [41,42]. Although participant withdrawal cannot be eliminated, this exercise increased the confidence of our

**Table 2.** Reasons for withdrawal.

|                                              | REASON FOR WITHDRAW                        | BASELINE TO PHASE 2 AS %<br>(OF HEALTH n35 OR<br>NON-HEALTH n53) | PHASE 2 TO PHASE 3<br>AS % (OF HEALTH n35<br>OR NON-HEALTH n16) | PHASE 3 TO PHASE 4 AS %<br>(OF HEALTH n15 OR<br>NON-HEALTH n12) |
|----------------------------------------------|--------------------------------------------|------------------------------------------------------------------|-----------------------------------------------------------------|-----------------------------------------------------------------|
| HEALTH                                       | <b>Too ill</b>                             | <b>83% (29/35)</b>                                               | <b>83% (29/35)</b>                                              | <b>93% (14/15)</b>                                              |
|                                              | <i>Male (simple count)</i>                 | 9                                                                | 13                                                              | 1                                                               |
|                                              | <i>Female (simple count)</i>               | 18                                                               | 16                                                              | 13                                                              |
|                                              | <b>Too tired</b>                           | <b>9% (3/35)</b>                                                 | <b>9% (3/35)</b>                                                | -                                                               |
|                                              | <i>Male</i>                                | -                                                                | -                                                               | -                                                               |
|                                              | <i>Female</i>                              | 3                                                                | 3                                                               | -                                                               |
|                                              | <b>Withdrawn by family</b> (lost capacity) | <b>6% (2/35)</b>                                                 | <b>3% (1/35)</b>                                                | -                                                               |
|                                              | <i>Male</i>                                | 1                                                                | -                                                               | -                                                               |
|                                              | <i>Female</i>                              | 1                                                                | 1                                                               | -                                                               |
|                                              | <b>Too many other health appts.</b>        | <b>3% (1/35)</b>                                                 | <b>6% (2/35)</b>                                                | <b>7% (1/15)</b>                                                |
|                                              | <i>Male</i>                                | -                                                                | 2                                                               | -                                                               |
|                                              | <i>Female</i>                              | 1                                                                | -                                                               | 1                                                               |
|                                              | <b>Total % health</b>                      | <b>40% (35/88)</b>                                               | <b>68% (35/51)</b>                                              | <b>56% (15/27)</b>                                              |
|                                              | NON-HEALTH                                 | <b>Concerns about privacy</b>                                    | <b>11% (6/53)</b>                                               | -                                                               |
| <i>Male</i>                                  |                                            | 2                                                                | -                                                               | -                                                               |
| <i>Female</i>                                |                                            | 4                                                                | -                                                               | -                                                               |
| <b>Didn't enjoy last time</b>                |                                            | -                                                                | <b>6% (1/16)</b>                                                | -                                                               |
| <i>Male</i>                                  |                                            | -                                                                | -                                                               | -                                                               |
| <i>Female</i>                                |                                            | -                                                                | 1                                                               | -                                                               |
| <b>Lost interest</b>                         |                                            | <b>23% (12/53)</b>                                               | <b>6% (5/16)</b>                                                | -                                                               |
| <i>Male</i>                                  |                                            | 1                                                                | -                                                               | -                                                               |
| <i>Female</i>                                |                                            | 11                                                               | 5                                                               | -                                                               |
| <b>Lost to follow up</b> (moved out of area) |                                            | <b>4% (2/53)</b>                                                 | -                                                               | <b>25% (3/12)</b>                                               |
| <i>Male</i>                                  |                                            | 2                                                                | -                                                               | 2                                                               |
| <i>Female</i>                                |                                            | -                                                                | -                                                               | 1                                                               |
| <b>Only ever agreed to one interview</b>     |                                            | <b>2% (1/53)</b>                                                 | -                                                               | -                                                               |
| <i>Male</i>                                  |                                            | 1                                                                | -                                                               | -                                                               |
| <i>Female</i>                                |                                            | -                                                                | -                                                               | -                                                               |
| <b>Recent bereavement</b>                    |                                            | <b>2% (1/53)</b>                                                 | <b>13% (2/16)</b>                                               | -                                                               |
| <i>Male</i>                                  |                                            | -                                                                | 1                                                               | -                                                               |
| <i>Female</i>                                |                                            | 1                                                                | 1                                                               | -                                                               |
| <b>Spouse unwell</b>                         |                                            | -                                                                | <b>6% (1/16)</b>                                                | <b>8% (1/12)</b>                                                |
| <i>Male</i>                                  |                                            | -                                                                | -                                                               | 1                                                               |
| <i>Female</i>                                |                                            | -                                                                | 1                                                               | -                                                               |
| <b>Too busy</b>                              |                                            | <b>4% (2/53)</b>                                                 | <b>6% (1/16)</b>                                                | -                                                               |
| <i>Male</i>                                  |                                            | 2                                                                | -                                                               | -                                                               |
| <i>Female</i>                                |                                            | -                                                                | 1                                                               | -                                                               |
| <b>Too much hassle</b>                       |                                            | <b>28% (15/53)</b>                                               | -                                                               | <b>8% (1/12)</b>                                                |
| <i>Male</i>                                  |                                            | 2                                                                | -                                                               | -                                                               |
| <i>Female</i>                                |                                            | 13                                                               | -                                                               | 1                                                               |
| <b>No reason given</b>                       |                                            | <b>23% (12/53)</b>                                               | <b>38% (6/16)</b>                                               | <b>58% (7/12)</b>                                               |
| <i>Male</i>                                  |                                            | 5                                                                | 1                                                               | 2                                                               |
| <i>Female</i>                                |                                            | 7                                                                | 5                                                               | 5                                                               |
| <b>Destroy all</b>                           | <b>4% (2/53)</b>                           | -                                                                | -                                                               |                                                                 |
| <b>Total % non-health</b>                    | <b>60% (53/88)</b>                         | <b>31% (16/51)</b>                                               | <b>44% (12/27)</b>                                              |                                                                 |

## NOTE:

• Individual % are rounded and as such may not total 100%.

doi:10.1371/journal.pone.0108370.t002

**Table 3.** Key health and socio-economic characteristics associated with phase to phase attrition.

|                                                                            | BASELINE TO PHASE 2             |          | PHASES 2 TO 3                   |          | PHASES 3 TO 4                   |          |
|----------------------------------------------------------------------------|---------------------------------|----------|---------------------------------|----------|---------------------------------|----------|
|                                                                            | Withdraw for Non-Health Reasons | Referent | Withdraw for Non-Health Reasons | Referent | Withdraw for Non-Health Reasons | Referent |
| Men                                                                        |                                 |          |                                 |          |                                 |          |
| Women                                                                      | 1.51 (0.82–2.75)                | Referent | 1.31 (0.59–2.92)                | Referent | 0.70 (0.33–1.50)                | Referent |
| Years in Education:                                                        |                                 |          |                                 |          |                                 |          |
| 12+                                                                        | 0.96 (0.36–2.56)                | Referent | 1.52 (0.29–8.01)                | Referent | 1.74 (0.45–6.77)                | Referent |
| 10–11                                                                      | 1.14 (0.49–2.64)                | Referent | 2.32 (0.53–10.07)               | Referent | 1.39 (0.40–4.88)                | Referent |
| 0–9                                                                        |                                 |          |                                 |          |                                 |          |
| NS-SEC (3 class version: based upon **head of household's main occupation) |                                 |          |                                 |          |                                 |          |
| Managerial/Professional                                                    | 2.21 (0.92–5.31)                | Referent | 2.65 (0.52–13.40)               | Referent | 0.84 (0.22–3.18)                | Referent |
| Intermediate                                                               | 1.89 (0.95–3.77)                | Referent | 5.38 (1.59–18.19) ‡             | Referent | 1.37 (0.59–3.18)                | Referent |
| Routine/Manual                                                             |                                 |          |                                 |          |                                 |          |
| Area Deprivation (calculated index of multiple deprivation IMD):           |                                 |          |                                 |          |                                 |          |
| 0–25                                                                       | 1.57 (0.75–3.29)                | Referent | 0.81 (0.32–2.02)                | Referent | 0.97 (0.42–2.29)                | Referent |
| 25–75                                                                      | 2.04 (0.91–4.56)                | Referent | 1.28 (0.48–3.39)                | Referent | 0.70 (0.23–2.14)                | Referent |
| 75–100                                                                     |                                 |          |                                 |          |                                 |          |
| Self-Rated Health (compared to others of same age):                        |                                 |          |                                 |          |                                 |          |
| Excellent/Very Good                                                        | 1.32 (0.70–2.50)                | Referent | 1.96 (0.76–5.05)                | Referent | 0.77 (0.30–2.00)                | Referent |
| Good                                                                       | 1.59 (0.77–3.28)                | Referent | 3.09 (1.15–8.31) ‡              | Referent | 1.77 (0.72–4.33)                | Referent |
| Fair/Poor                                                                  |                                 |          |                                 |          |                                 |          |
| Marital Status:                                                            |                                 |          |                                 |          |                                 |          |
| Married                                                                    | 1.18 (0.63–2.21)                | Referent | 0.66 (0.30–1.42)                | Referent | 1.01 (0.43–2.37)                | Referent |
| Widowed                                                                    | 0.98 (0.36–2.61)                | Referent | (no obs)                        | Referent | 0.29 (0.04–2.38)                | Referent |
| Never/Divorced/Separated                                                   |                                 |          |                                 |          |                                 |          |
| Living Arrangements*:                                                      |                                 |          |                                 |          |                                 |          |
| Alone                                                                      | 1.24 (0.45–3.41)                | Referent | 1.01 (0.26–3.92)                | Referent | 0.29 (0.04–2.37)                | Referent |
| With spouse                                                                | 1.03 (0.52–2.02)                | Referent | 0.81 (0.34–1.95)                | Referent | 0.93 (0.39–2.17)                | Referent |
| With others                                                                |                                 |          |                                 |          |                                 |          |
| Housing type:                                                              |                                 |          |                                 |          |                                 |          |
| Standard                                                                   | 1.54 (0.74–3.20)                | Referent | 1.07 (0.36–3.17)                | Referent | 0.36 (0.08–1.56)                | Referent |
| Sheltered                                                                  | 2.42 (1.01–5.77)                | Referent | 1.20 (0.27–5.29)                | Referent | (no obs)                        | Referent |
| Institutional                                                              |                                 |          |                                 |          |                                 |          |
|                                                                            |                                 |          |                                 |          |                                 |          |

Table 3. Cont.

|                                         | BASELINE TO PHASE 2             |                    | PHASES 2 TO 3                   |                  | PHASES 3 TO 4                   |                     |
|-----------------------------------------|---------------------------------|--------------------|---------------------------------|------------------|---------------------------------|---------------------|
|                                         | Withdraw for Non-Health Reasons | Referent           | Withdraw for Non-Health Reasons | Referent         | Withdraw for Non-Health Reasons | Referent            |
| Depression (GDS -15 score) †:           | None                            | Referent           | -                               | -                | -                               | -                   |
|                                         | Mild                            | 0.42 (0.10–1.79)   | 2.17 (0.77–6.11)                | 0.66 (0.15–2.93) | 0.66 (0.15–2.93)                | 3.04 (0.75–12.24)   |
|                                         | Severe                          | -                  | 1.31 (0.29–5.88)                | 1.46 (0.32–6.63) | 2.92 (0.92–9.25)                | 7.21 (1.70–30.52) ‡ |
| Disability (IADL's score) †:            | 7+                              | Referent           | Referent                        | Referent         | Referent                        | Referent            |
|                                         | 1–6                             | 0.49 (0.27–0.91) ‡ | 0.64 (0.30–1.38)                | 0.52 (0.20–1.34) | 0.62 (0.27–1.42)                | 0.71 (0.23–2.22)    |
|                                         | None                            | 0.55 (0.26–1.17)   | (no obs)                        | 0.73 (0.19–2.86) | 0.59 (0.16–2.20)                | 0.66 (0.07–5.90)    |
| Cognitively Impaired (sMMSE <= 21)      |                                 | 1.64 (0.74–3.69)   | 1.64 (0.55–4.91)                | Not completed    | Not completed                   | 2.27 (0.60–8.61)    |
| Hospital Inpatient in past 12 months    |                                 | 0.87 (0.43–1.77)   | 1.11 (0.44–2.80)                | 0.42 (0.12–1.45) | 0.89 (0.35–2.30)                | 0.62 (0.13–2.84)    |
| Disease count †                         |                                 | 0.95 (0.76–1.19)   | 1.15 (0.86–1.54)                | Not completed    | Not completed                   | 0.76 (0.45–1.29)    |
| Consultations with GP in past 12 months |                                 | 0.97 (0.91–1.03)   | 1.02 (0.96–1.10)                | Not completed    | Not completed                   | 0.99 (0.89–1.10)    |

## NOTE:

- All data taken from HA excluding 'Disease count' and 'Consultations' taken from GPRR.
- NS-SEC = National Statistics Socio-economic Classification (3 class version: based upon head of household main occupation – \*\*using participant's (or in the case of married women the husband's) main occupation during their working life; GDS = geriatric depression scale; sMMSE = standardised mini-mental state examination.
- \*Excludes participants in institutional care.
- †GDS omitted if score <15 on sMMSE.
- ‡No of activities of daily living (IADL's) carried out with difficulty or requiring an aid, appliance, or personal help.
- †Disease count derived from 8 chronic diseases from GPRR (Table 3, Box 1).
- ‡Statistically significant.

doi:10.1371/journal.pone.0108370.t003



**Table 4.** Potential Solutions to Post-inclusion Attrition Due to Withdraw.

| REASONS FOR WITHDRAWAL                    | SOLUTIONS                                                                                                                                                                                                                                                                                                                                                                                                                                                                                                                      |
|-------------------------------------------|--------------------------------------------------------------------------------------------------------------------------------------------------------------------------------------------------------------------------------------------------------------------------------------------------------------------------------------------------------------------------------------------------------------------------------------------------------------------------------------------------------------------------------|
| No reason                                 | *Prompt for more information using open/closed questions. When did 'no reason' most commonly occur? *Leave door open giving individual the opportunity to get back in touch                                                                                                                                                                                                                                                                                                                                                    |
| Too ill/Too tired                         | Timing: is the health problem transient? Explore if this is a new health event. Set time scale to ring back. Reduce research activity. Suspend rather than cease research activity.                                                                                                                                                                                                                                                                                                                                            |
| Lost interested                           | Use knowledge to create interest. Ensure participant feels valued                                                                                                                                                                                                                                                                                                                                                                                                                                                              |
| Didn't enjoy last time                    | Try to determine if any specific aspect of assessment is causing problem and modify/reduce research activity to suit.                                                                                                                                                                                                                                                                                                                                                                                                          |
| Too busy/Other appointments & commitments | Split visits into shorter duration. Flexibility: fit visits around the participant's 'other' commitments – offer 'out of hours' visits.                                                                                                                                                                                                                                                                                                                                                                                        |
| Visits too long                           | Try to pin down if any particular aspect of the assessment was as too much of a burden and modify to/reduce to suit. Check any previous technical problems that caused interview to be longer and reassure or modify to suit. Split visits into shorter duration. Take time out: Chat/break/take refreshment then assess if it is appropriate to re-engage the participant with the assessment. Be mindful of your own time constraints (other appointments). Acknowledge and focus on the positive of what has been achieved. |
| Lost to follow-up                         | Ensure all avenues of establishing whereabouts have been explored: review information held on database, alternate contacts, GP, care workers, trace service etc.                                                                                                                                                                                                                                                                                                                                                               |

## NOTE:

- \*Solutions apply to each category.
- doi:10.1371/journal.pone.0108370.t004

research nurses in recognising and actively seeking to remove barriers to retention (Table 4).

### Motivating staff

In agreement with Patel et al [14] that research can be a solitary occupation, we found the continual motivation of staff to be crucial. Ejiogu et al [43] offered specific recommendations such as staff incentives, including supporting pursuit of academic goals. We found this incentive successful not only in maintaining staff motivation but also in enhancing team knowledge. Other incentives included target-related bonus schemes, especially to compensate staff nearing the end of a fixed term appointment and postponing the search for alternative employment.

### Conclusions

It is imperative that participants have the right to withdraw from research at any time. However, added to those drivers aiming to "... get the right people into research, older people, people with comorbid diseases, and frail people. These are the people we care

for ..." [44] (p16), we consider it vitally important for researchers to examine reasons for attrition to ensure that attrition does not result from lack of understanding or barriers to participation which, if addressed through effective retention strategies, could protect each individual's right to continue their participation in research.

### Acknowledgments

We acknowledge the operational support of North of England Commissioning Support Unit, the local general practitioners and their staff, the research nurses, laboratory technicians, data management and clerical team, as well as many colleagues for their expert advice. Thanks are due especially to the study participants and, where appropriate their families and carers.

### Author Contributions

Conceived and designed the experiments: KD LR JC CJ TBLK. Analyzed the data: KD AK CJ. Wrote the paper: KD AK LR JH JMH SAHB JE JC CJ TBLK.

### References

- Wanless D (2002) Securing Our Future Health: Taking a Long Term View. London: HM Treasury.
- Weverling-Rijnsburger AWE, Blauw GJ, Lagaay AM, Knock DL, Meinders AE, et al. (1997) Total cholesterol and risk of mortality in the oldest old. *The Lancet* 350: 1119–1123.
- Andersen-Ranberg K, Christensen K, Jeune B, Skytthe A, Vasegaard L, et al. (1999) Declining physical abilities with age: a cross-sectional study of older twins and centenarians in Denmark. *Age and Ageing* 28: 373–377.
- Hayman K, Kerse N, Dyall L, Kepa M, Teh R, et al. (2012) Life and Living in Advanced Age: A Cohort Study in New Zealand -Te Puawaitanga o Nga Tapuwae Kia Ora Tonu, LiLACS NZ: Study protocol. *BMC Geriatrics* 12: 33.
- Brayne C, McCracken C, Matthews FE and Medical Research Council Cognitive Function and Ageing S (2006) Cohort profile: the Medical Research Council Cognitive Function and Ageing Study (CFAS). *International Journal of Epidemiology* 35: 1140–1145.
- Marmot M (2003): Institute for Fiscal Studies, London.
- Collerton J, Davies K, Jagger C, Kingston A, Bond J, et al. (2009) Health and disease in 85-year olds: baseline findings from the Newcastle 85+ cohort study. *Br Med J* 339: b4904.
- McMurdo MET, Roberts H, Parker S, Wyatt N, May H, et al. (2011) Improving recruitment of older people to research through good practice. *Age and Ageing* 40: 659–665.
- Davies K, Collerton JC, Jagger C, Bond J, Barker SA, et al. (2010) Engaging the oldest old in research: lessons from the Newcastle 85+ study. *BMC Geriatr* 10: 64.
- Bower P, Wallace P, Ward E, Gaffy J, Miller J, et al. (2009) Improving recruitment to health research in primary care. *Family Practice* 26: 391–397.
- Cotter RB, Burke JD, Loeber R, Navratil JL (2002) Innovative Retention Methods in Longitudinal Research: A Case Study of the Developmental Trends Study. *Journal of Child and Family Studies* 11: 458–498.
- Flick SN (1988) Managing attrition in clinical research. *Clinical Psychology Review* 8: 499–515.
- Gustavson K, Roysamb E, von Soest T, Helland MJ, Mathiesen KS (2012) Longitudinal associations between relationship problems, divorce, and life satisfaction: findings from a 15-year population-based study. *J Posit Psychol* 7: 188–197.
- Patel M, Doku V, Tennakoon L (2003) Challenges in recruitment of research participants. *Advances in Psychiatric Treatment* 9: 229–238.
- Schaffer RH (1996) *Social Development*. Blackwell Publishers Inc., Oxford.
- Zbracki K, Drotar D, Kirchner HL, Schluchter M, Redline S, et al. (2003) Predicting Attrition in a Pediatric Asthma Intervention Study. *Journal of Pediatric Psychology* 28: 519–528.
- Bonk J (2010) A Road Map for the Recruitment and Retention of Older Adult Participants for Longitudinal Studies. *Journal of the American Geriatrics Society* 58: S303–S307.

18. National institute of Mental Health (NIMH) (2005) Points to consider about recruitment and retention while preparing a clinical research study. Available: <http://www.nimh.nih.gov/funding/grant-writing-and-application-process/nimh-policy-for-the-recruitment-of-participants-in-clinical-research.shtml>. Accessed 2013 Oct 23.
19. Tinker A, Mein G, Bhamra S, Ashcroft R, Seale C (2009) Retaining Older People in Longitudinal Research Studies: Some Ethical Issues. *Research Ethics Review* 5: 71–74.
20. Morris G, Kirkwood TBL (2014) *An Age of Wonders: the story of the Newcastle 85+ study*. Martins the printers.
21. Office for National Statistics (2010) The National Statistics Socio-economic Classification (NS-SEC rebased on the SOC2010). Available: <http://www.ons.gov.uk/ons/guide-method/classifications/current-standard-classifications/soc2010/soc2010-volume-3-ns-sec—rebased-on-soc2010—user-manual/index.html>. Accessed 2013 June 03.
22. Office of the deputy Prime Minister (2004) The English indices of deprivation Available: <http://webarchive.nationalarchives.gov.uk/20100410180038/http://www.communities.gov.uk/archived/general-content/communities/indicesofdeprivation/216309/indicesdeprivation/>. Accessed 2013 June 09.
23. Jacomb P, Jorm A, Korten A, Christensen H, Henderson AS (2002) Predictors of refusal to participate: a longitudinal health survey of the elderly in Australia. *BMC Public Health* 2: 4.
24. Mein G, Johal S, Grant R, Seale C, Ashcroft R, et al. (2012) Predictors of two forms of attrition in a longitudinal health study involving ageing participants: An analysis based on the Whitehall II study. *BMC Medical Research Methodology* 12: 164.
25. Matthews F, Chatfield M, Freeman C, McCracken C, Brayne C, et al. (2004) Attrition and bias in the MRC cognitive function and ageing study: an epidemiological investigation. *BMC Public Health* 4: 12.
26. Dapp U, Anders J, von Renteln-Kruse W, Golgert S, Meier-Baumgartner HP, et al. (2012) The Longitudinal Urban Cohort Ageing Study (LUCAS): study protocol and participation in the first decade. *BMC Geriatr* 12: 35.
27. Zunzunegui MV, Béland F, Gutiérrez-Cuadra P (2001) Loss to follow-up in a longitudinal study on aging in Spain. *Journal of Clinical Epidemiology* 54: 501–510.
28. Chatfield MD, Brayne CE, Matthews FE (2005) A systematic literature review of attrition between waves in longitudinal studies in the elderly shows a consistent pattern of dropout between differing studies. *Journal of Clinical Epidemiology* 58: 13–19.
29. Deeg DJH, van Tilburg T, Smit JH, de Leeuw ED (2002) Attrition in the Longitudinal Aging Study Amsterdam: The effect of differential inclusion in side studies. *Journal of Clinical Epidemiology* 55: 319–328.
30. van Beijsterveldt CEM, van Boxtel MPJ, Bosma H, Houx PJ, Buntinx F, et al. (2002) Predictors of attrition in a longitudinal cognitive aging study: The Maastricht Aging Study (MAAS). *Journal of Clinical Epidemiology* 55: 216–223.
31. Helliwell B, Aylesworth R, McDowell I, Baumgarten M, Sykes E (2001) Correlates of Non-participation in the Canadian Study of Health and Aging. *International Psychogeriatrics* 13: 49–56.
32. Mihelic AH, Crimmins EM (1997) Loss to Follow-up in a Sample of Americans 70 Years of Age and Older: The LSOA 1984–1990. *The Journals of Gerontology Series B: Psychological Sciences and Social Sciences* 52B: S37–S48.
33. Jefferys M, Thane P (1989) *Ageing Society and ageing People*. In: M. Jefferys editor. *Growing Old in the 20th Century*. Routledge. pp. 1–21.
34. Kingston A, Davies K, Collerton J, Robinson L, Duncan R, et al. (2014) The contribution of diseases to the male-female disability-survival paradox in the very old: results from the Newcastle 85+ study. *PLoS one* 9: e88016.
35. Bronnum-Hansen H, Petersen I, Jeune B, Christensen K (2009) Lifetime according to health status among the oldest olds in Denmark. *Age Ageing* 38: 47–51.
36. Jagger C, Gillies C, Moscone F, Cambois E, Van Oyen H, et al. (2008) Inequalities in healthy life years in the 25 countries of the European Union in 2005: a cross-national meta-regression analysis. *Lancet* 372: 2124–2131.
37. Olshansky SJ, Rudberg MA, Cassel BA, Brady JA (1991) Trading off longer life for worsening health: the expansion of morbidity hypothesis. *Journal of Ageing and Health* 3: 194–216.
38. Orwig D, Rickles NM, Martin LG (2011) Methodological issues in pharmacotherapy research in older adults. *Am J Geriatr Pharmacother* 9: 173–189.
39. Blanton S, Morris DM, Prettyman MG, McCulloch K, Redmond S, et al. (2006) *Lessons Learned in Participant Recruitment and Retention: The EXCITE Trial*. *Physical Therapy* 86: 1520–1533.
40. Oswald F, Rowels G (2006) Beyond the relocation trauma in old age: New trends in today's elders' residential decisions. In H-W Wahl, C. Tesch-Römer, & A. Hoff, editors. *New Dynamics in Old Age: Environmental and Societal Perspectives* pp. 127–152. Amityville, New York: Baywood Publishers.
41. Cunliffe AL (2009) Reflexivity, Learning and Reflexive Practice. In: C. V. F. Steven J Armstrong, editor editors. *The SAGE Handbook of Management Learning, Education and Development*. Sage publications Ltd.
42. Doyle S (2013) Reflexivity and the Capacity to Think. *Qualitative Health Research* 23: 248–255.
43. Ejiogu N, Norbeck JH, Mason MA, Cromwell BC, Zonderman AB, et al. (2011) Recruitment and Retention Strategies for Minority or Poor Clinical Research Participants: Lessons From the Healthy Aging in Neighborhoods of Diversity Across the Life Span Study. *The Gerontologist* 51: S33–S45.
44. Witham MD, George J (2014) Clinical trial design for older people—time for a rethink. *QJM* 107: 15–16.
